# Supplementary material
Source: HighWire-hosted journal article supplement (http://jpet.aspetjournals.org/highwire/filestream/156486/field_highwire_adjunct_files/0/2330_supp_fig1.pdf)
Supplement: 2330_supp_fig1.pdf [file 2330_supp_fig1.pdf]

# **CH6824025, potent and selective DDR1 inhibitor, reduces kidney fibrosis in UUO mice**

## **Names of authors**

Yukari Yasui, Takeshi Murata, Yoshinori Tsuboi, Atsuko Murai, Naoshi Horiba

Research Division, Chugai Pharmaceutical Co., Ltd., Yokohama city, Kanagawa, Japan. (Y.Y., T.M., Y.T., N.H.)

Translational Research Division, Chugai Pharmaceutical Co., Ltd., Yokohama city, Kanagawa, Japan. (A.M.)

The Journal of Pharmacology and Experimental Therapeutics

JPET-AR-2024-002330



Supplemental Figure 1. Relative DDR1 mRNA expression in the kidney at day 1 and 7 after the surgery. The actual values are represented as dots, and the columns represent mean. n=2 (Sham), n=5 (Vehicle and 200 mg/kg). \*P<0.05 significant difference versus UUO mice treated with vehicle (Student's t-test).
